# Supplementary material for: Cleaning symbiosis in coral reefs of Jardines de la Reina National Park
Source: PeerJ. 2023 Dec 6;11:e16524. doi: 10.7717/peerj.16524 (PMC10710127; doi:10.7717/peerj.16524)
Supplement: Supplemental Information 3 [file peerj-11-16524-s003.xlsx]

## Sheet: AnclitaV1
Site	Anclita	Species/transect	Cleaning stations	Client	Cleaner	Abundance
Habitat	drop-off	Mycteroperca tigris	1	1		1
UM	1	Epinephelus striatus	2	1		1
Observer	Leandro Rodríguez-Viera	Mycteroperca bonaci	2	1		1
Date	2019-03-04	Mycteroperca bonaci	3	1		1
Depth	15m
Time	08:30h

## Sheet: CrucesV1
Site	Cruces	Species/transect	Cleaning stations	Client	Cleaner	Abundance
Habitat	drop-off	Clepticus parrae	1	1		2
UM	2	Bodianus rufus	1		1	2
Observer	Leandro Rodríguez-Viera	Thalassoma bifasciatum	1		1	1
Date	2019-03-05	Acanthurus coerulus	2	1		3
Depth	15m	Bodianus rufus	2		1	2
Time	15:00h	Elacatinus sp	2		1

## Sheet: CrucesV2
Site	Cruces	Species/transect	Cleaning stations	Client	Cleaner	Abundance
Habitat	drop-off	Sparisoma viride	1	1		1
UM	2	Mycteroperca tigris	1	1		1
Observer	Leandro Rodríguez-Viera	Elacatinus sp	1		1	3
Date	2019-03-05	Thalassoma bifasciatum	1		1	2
Depth	15m	Mycteroperca bonaci	2	1		2
Time	15:00h	Elacatinus sp	2		1	4
		Lachnolaimus maximus	3	1		1
		Lactophrys trigonus	3	1		1
		Bodianus rufus	3		1	3

## Sheet: CachibocaV1
Site	Cachiboca	Species/transect	Cleaning stations	Client	Cleaner	Abundance
Habitat	drop-off	Acanthurus coerulus	1	1		1
UM	T1	Acanthurus tractus	1	1		2
Observer	Leandro Rodríguez-Viera	Bodianus rufus	1		1	2
Date	2019-03-06	Elacatinus sp	1		1	1
Depth	15m	Thalassoma bifasciatum	1		1	1
Time	08:00h	Acanthurus chirugus	2	1		1
		Scarus iseri	2	1		1
		Sparisoma viride	2	1		1
		Sparisoma aurofrenatum	2	1		1
		Thalassoma bifasciatum	2		1	10
		Acanthurus coerulus	2	1		1
		Acanthurus tractus	3	1		3
		Acanthurus chirugus	3	1		1
		Clepticus parrae	3	1		1
		Bodianus rufus	3		1	2
		Sparisoma viride	4	1		1
		Elacatinus sp	4		1	5

## Sheet: CachibocaV2
Site	Cachiboca	Species/transect	Cleaning stations	Client	Cleaner	Abundance
Habitat	drop-off	Acanthurus coerulus	1	1		3
UM	T2	Scarus iseri	1	1		1
Observer	Leandro Rodríguez-Viera	Bodianus rufus	1		1	3
Date	2019-03-06	Sparisoma viride	2	1		1
Depth	15m	Elacatinus sp	2		1	5
Time	08:00h	Acanthurus tractus	3	1		3
		Bodianus rufus	3		1	5
		Elacatinus sp	3		1	1
		Thalassoma bifasciatum	3		1	2
		Scarus taeniopterus	3	1		1

## Sheet: HierroV2
Site	Hierros	Species/transect	Cleaning stations	Client	Cleaner	Abundance
Habitat	drop-off	Sparisoma viride	1	1		1
UM	2	Thalassoma bifasciatum	1		1	2
Observer	Leandro Rodríguez-Viera
Date	2019-03-06
Depth	15m
Time	10:00h

## Sheet: CarabineroV1
Site	Carabinero	Species/transect	Cleaning stations	Client	Cleaner	Abundance
Habitat	drop-off	Epinephelus striatus	1	1		1
UM	1	Elacatinus sp	1		1	2
Observer	Leandro Rodríguez-Viera	Sparisoma viride	2	1		1
Date	2019-03-06	Bodianus rufus	2		1	3
Depth	15m	Scarus iseri	3	1		1
Time	15:00h	Elacatinus sp	3		1	3
		Bodianus rufus	3		1	2

## Sheet: BocaSecaV2
Site	Boca Seca	Species/transect	Cleaning stations	Client	Cleaner	Abundance
Habitat	drop-off	Epinephelus striatus	1	1		1
UM	2	Elacatinus sp	1		1	6
Observer	Leandro Rodríguez-Viera	Epinephelus striatus	2	1		1
Date	2019-03-07	Acanthurus chirugus	2	1		1
Depth	13m	Holocentrus adscensionis	2	1		1
Time	08:00h	Abudefduf saxatilis	2	1		1
		Elacatinus sp	2		1	6
		Bodianus rufus	2		1	3

## Sheet: PeraltaV1
Site	Peralta	Species/transect	Cleaning stations	Client	Cleaner	Abundance
Habitat	drop-off	Sparisoma viride	1	1		1
UM	T1	Scarus iseri	1	1		1
Observer	Leandro Rodríguez-Viera	Bodianus rufus	1		1	7
Date	2019-03-07
Depth	15m
Time	14:00h

## Sheet: PeraltaV2
Site	Peralta	Species/transect	Cleaning stations	Client	Cleaner	Abundance
Habitat	drop-off	Sargocentrun vexillarium	1	1		2
UM	T2	Sparisoma viride	1	1		1
Observer	Leandro Rodríguez-Viera	Microspathodon chrysurus	1	1		1
Date	2019-03-07	Bodianus rufus	1		1	6
Depth	15m	Epinephelus guttatus	2	1		1
Time	14:00h	Elacatinus sp	2		1	1

[truncated: 86 more sheets: Boca RicaV1, Boca Rica V2, Mexico V2, Macao V1, Macao V2, Bretón V1, Bretón V2, Esterón V1, EsterónV2, Cinco Balas V1, Cinco Balas V2, Casimba V1, Casimba V2, Alcatraz V1, Alcatraz V2, Alcatraz C, Boca Grande, Pino V1, Pino V2, Peruano V1 …]
