# Supplementary material for: Cleaning symbiosis in coral reefs of Jardines de la Reina National Park
Source: PeerJ. 2023 Dec 6;11:e16524. doi: 10.7717/peerj.16524 (PMC10710127; doi:10.7717/peerj.16524)
Supplement: Supplemental Information 4 — For each region of the national park (east, center and west) and for the entire park as a whole. [file peerj-11-16524-s004.xlsx]

## Sheet: JRNP_Interaction_Matrix
	Cleaner Species
Client Species	Bodianus rufus	Thalassoma bifasciatum	Elacatinus genie/evelynae	Stenopus hispidus	Ancylomenes pedersoni	Total interaction per client species
Abudefduf saxatilis	7	0	0	1	1	9
Acanthurus chirurgus	14	20	0	0	0	34
Acanthurus coeruleus	30	8	5	0	0	43
Acanthurus tractus	3	6	1	0	0	10
Anisotremus virginicus	3	0	0	0	0	3
Caranx ruber	64	2	2	0	0	68
Cephalopholis cruentata	0	0	3	0	0	3
Chromis cyanea	4	5	0	1	0	10
Chromis multilineata	0	1	0	0	0	1
Clepticus parrae	42	128	6	0	0	176
Epinephelus guttatus	0	0	3	0	0	3
Epinephelus striatus	5	6	26	1	1	39
Gymnothorax funebris	0	0	5	1	0	6
Haemulon plumierii	0	2	0	0	0	2
Haemulon sciurus	0	0	1	0	0	1
Holacanthus ciliaris	2	1	0	0	0	3
Holacanthus tricolor	1	1	0	1	0	3
Holocentrus rufus	0	0	6	0	0	6
Kyphosus sp.	5	0	0	0	0	5
Lachnolaimus maximus	11	3	8	0	0	22
Lactophrys trigonus	0	1	0	0	0	1
Melichthys niger	1	0	2	0	0	3
Microspathodon chrysurus	0	2	0	0	0	2
Mycteroperca bonaci	1	0	8	0	0	9
Mycteroperca tigris	7	0	20	4	3	34
Mycteroperca venenosa	0	0	4	0	0	4
Ocyurus chrysurus	20	0	0	0	0	20
Pterois sp.	1	0	1	0	0	2
Sargocentron vexillarium	2	0	0	0	0	2
Scarus coelestinus	0	0	1	0	0	1
Scarus iseri	5	15	8	0	0	28
Scarus taeniopterus	1	0	0	0	0	1
Sparisoma aurofrenatum	0	1	2	0	0	3
Sparisoma viride	4	15	11	0	0	30
Sphyraena barracuda	1	0	0	0	0	1
Total interaction per cleaner species	234	217	123	9	5	588

## Sheet: West_Region_Matrix
	Cleaner Species
Client Species	Bodianus rufus	Thalassoma bifasciatum	Elacatinus genie/evelynae	Stenopus hispidus	Ancylomenes pedersoni	Total interaction per client species
Acanthurus chirurgus	6	10	0	0	0	16
Acanthurus tractus	0	2	0	0	0	2
Caranx ruber	19	1	0	0	0	20
Chromis cyanea	2	0	0	0	0	2
Clepticus parrae	23	33	0	0	0	56
Epinephelus striatus	5	3	25	1	1	35
Gymnothorax funebris	0	0	4	1	0	5
Holacanthus ciliaris	2	1	0	0	0	3
Lachnolaimus maximus	11	0	6	0	0	17
Mycteroperca bonaci	1	0	4	0	0	5
Mycteroperca tigris	3	0	10	4	3	20
Mycteroperca venenosa	0	0	3	0	0	3
Ocyurus chrysurus	7	0	0	0	0	7
Scarus coelestinus	0	0	1	0	0	1
Scarus iserti	0	7	0	0	0	7
Scarus taeniopterus	1	0	0	0	0	1
Sparisoma viride	1	0	0	0	0	1
Sphyraena barracuda	1	0	0	0	0	1
Total interaction per cleaner species	82	57	53	6	4	202

## Sheet: Central_Region_Matrix
	Cleaner Species
Client Species	Bodianus rufus	Thalassoma bifasciatum	Elacatinus genie/evelynae	Stenopus hispidus	Ancylomenes pedersoni	Total interaction per client species
Abudefduf saxatilis	2	0	0	0	0	2
Acanthurus coeruleus	2	1	2	0	0	5
Anisotremus virginicus	3	0	0	0	0	3
Caranx ruber	25	1	0	0	0	26
Cephalopholis cruentata	0	0	3	0	0	3
Chromis cyanea	0	5	0	0	0	5
Clepticus parrae	8	74	1	0	0	83
Epinephelus guttatus	0	0	2	0	0	2
Epinephelus striatus	0	3	1	0	0	4
Gymnothorax funebris	0	0	1	0	0	1
Haemulon plumierii	0	2	0	0	0	2
Haemulon sciurus	0	0	1	0	0	1
Holocentrus rufus	0	0	3	0	0	3
Kyphosus sp.	5	0	0	0	0	5
Lachnolaimus maximus	0	3	2	0	0	5
Lactophrys trigonus	0	1	0	0	0	1
Melichthys niger	1	0	2	0	0	3
Mycteroperca bonaci	0	0	4	0	0	4
Mycteroperca tigris	3	0	10	0	0	13
Mycteroperca venenosa	0	0	1	0	0	1
Ocyurus chrysurus	13	0	0	0	0	13
Scarus iseri	0	3	1	0	0	4
Sparisoma viride	0	2	1	0	0	3
Total interaction per cleaner species	62	95	35	0	0	192

## Sheet: East_Region_Matrix
	Cleaner Species
Client Species	Bodianus rufus	Thalassoma bifasciatum	Elacatinus genie/evelynae	Stenopus hispidus	Ancylomenes pedersoni	Total interaction per client species
Abudefduf saxatilis	3	0	0	0	0	3
Acanthurus chirurgus	2	0	0	0	0	2
Acanthurus coeruleus	26	6	1	0	0	33
Acanthurus tractus	3	2	1	0	0	6
Caranx ruber	20	0	2	0	0	22
Chromis cyanea	2	0	0	0	0	2
Chromis multilineata	0	1	0	0	0	1
Clepticus parrae	11	21	5	0	0	37
Epinephelus striatus	0	0	5	0	0	5
Epinephelus guttatus	0	0	1	0	0	1
Holacanthus tricolor	1	1	0	0	0	2
Holocentrus rufus	0	0	3	0	0	3
Microspathodon chrysurus	0	2	0	0	0	2
Mycteroperca tigris	1	0	0	0	0	1
Pterois sp.	1	0	1	0	0	2
Sargocentron vexillarium	2	0	0	0	0	2
Scarus iseri	5	5	7	0	0	17
Sparisoma aurofrenatum	0	1	2	0	0	3
Sparisoma viride	3	13	10	0	0	26
Total interaction per cleaner species	80	52	38	0	0	170
