# Supplementary material for: Cleaning symbiosis in coral reefs of Jardines de la Reina National Park
Source: PeerJ. 2023 Dec 6;11:e16524. doi: 10.7717/peerj.16524 (PMC10710127; doi:10.7717/peerj.16524)
Supplement: Supplemental Information 5 [file peerj-11-16524-s005.xlsx]

## Sheet: Cleaning_Station_Variables
Year	Site	MPA Region	Biotope	Cleaning Station Number	Client Species Diversity	Cleaner Species Diversity	Client Abundance	Cleaner Abundance
2019	Cachiboca	Center	drop-off	4	6	3	14	19
2019	Cachiboca	Center	drop-off	3	6	3	9	16
2019	Anclitas	Center	drop-off	3	3	0	4	0
2019	Las Cruces	Center	drop-off	2	2	3	5	6
2019	Las Cruces	Center	drop-off	3	5	4	6	12
2019	Las Auras	Center	drop-off	1	1	2	1	2
2019	Las Auras	Center	drop-off	2	2	2	21	9
2019	Peruano	Center	drop-off	4	2	2	26	16
2019	Peruano	Center	drop-off	5	4	2	18	17
2019	Pinos	Center	drop-off	1	1	1	1	1
2019	Pinos	Center	drop-off	2	2	2	2	4
2019	Bayameses	Center	drop-off	1	2	2	5	3
2019	Bayameses	Center	drop-off	5	4	4	17	19
2019	Bayameses	Center	reef crest	2	2	1	10	8
2022	Los Mogotes	Center	drop-off	6	4	3	30	17
2022	Anclitas	Center	drop-off	1	0	1	0	4
2019	Mexicana	East	drop-off	2	1	2	2	11
2019	Macao	East	drop-off	2	1	1	2	2
2019	Macao	East	drop-off	4	4	3	25	10
2019	Peralta	East	drop-off	1	2	1	2	7
2019	Peralta	East	drop-off	2	4	2	5	7
2019	Boca Rica	East	drop-off	3	2	3	12	21
2019	Boca Rica	East	drop-off	3	5	3	7	11
2019	Boca Seca	East	drop-off	2	4	3	5	15
2019	Los Hierros	East	drop-off	1	1	1	1	2
2019	Carabinero	East	drop-off	3	3	4	3	10
2022	Los Hierros	East	drop-off	5	1	2	7	8
2019	Boca Grande	West	drop-off	1	3	2	16	8
2019	Boca de Guano	West	drop-off	2	2	2	21	4
2019	Cinco Balas	West	drop-off	3	3	3	11	4
2019	Cinco Balas	West	drop-off	1	1	1	3	2
2019	Casimba	West	drop-off	1	1	2	7	2
2019	Casimba	West	drop-off	4	4	4	9	9
2019	Alcatraz	West	drop-off	2	3	3	12	6
2019	Alcatraz	West	drop-off	4	1	1	4	7
2019	Alcatraz	West	reef crest	1	1	1	1	2
2019	Breton	West	drop-off	2	2	2	2	5
2019	Breton	West	drop-off	4	2	5	4	15
2019	Esteron	West	drop-off	2	3	2	6	4
2019	Esteron	West	drop-off	5	4	4	11	11
2021	Horqueta	West	drop-off	1	2	1	2	2
2021	Horqueta	West	reef crest	2	1	1	2	1

## Sheet: Kruscal-Wallis Test Results
Table Analyzed	Cleaning Station Number vs Region
Kruskal-Wallis test
P value	0.6764
Exact or approximate P value?	Approximate
P value summary	ns
Do the medians vary signif. (P < 0.05)?	No
Number of groups	3
Kruskal-Wallis statistic	0.7819
Data summary
Number of treatments (columns)	3
Number of values (total)	42
Table Analyzed	Client Species Diversity vs Region
Kruskal-Wallis test
P value	0.5748
Exact or approximate P value?	Approximate
P value summary	ns
Do the medians vary signif. (P < 0.05)?	No
Number of groups	3
Kruskal-Wallis statistic	1.107
Data summary
Number of treatments (columns)	3
Number of values (total)	42
Table Analyzed	Cleaner Species Diversity vs Region
Kruskal-Wallis test
P value	0.9679
Exact or approximate P value?	Approximate
P value summary	ns
Do the medians vary signif. (P < 0.05)?	No
Number of groups	3
Kruskal-Wallis statistic	0.06533
Data summary
Number of treatments (columns)	3
Number of values (total)	42
Table Analyzed	Client Abundance vs Region
Kruskal-Wallis test
P value	0.5709
Exact or approximate P value?	Approximate
P value summary	ns
Do the medians vary signif. (P < 0.05)?	No
Number of groups	3
Kruskal-Wallis statistic	1.121
Data summary
Number of treatments (columns)	3
Number of values (total)	42
Table Analyzed	Cleaner Abundance vs Region
Kruskal-Wallis test
P value	0.1208
Exact or approximate P value?	Approximate
P value summary	ns
Do the medians vary signif. (P < 0.05)	No
Number of groups	3
Kruskal-Wallis statistic	4.228
Data summary
Number of treatments (columns)	3
Number of values (total)	42
