# Supplementary material for: Cleaning symbiosis in coral reefs of Jardines de la Reina National Park
Source: PeerJ journal article supplement (doi:10.7717/peerj.16524), 2023-12-06

Posterior Predictive Check  
Model-predicted lines should resemble observed data line

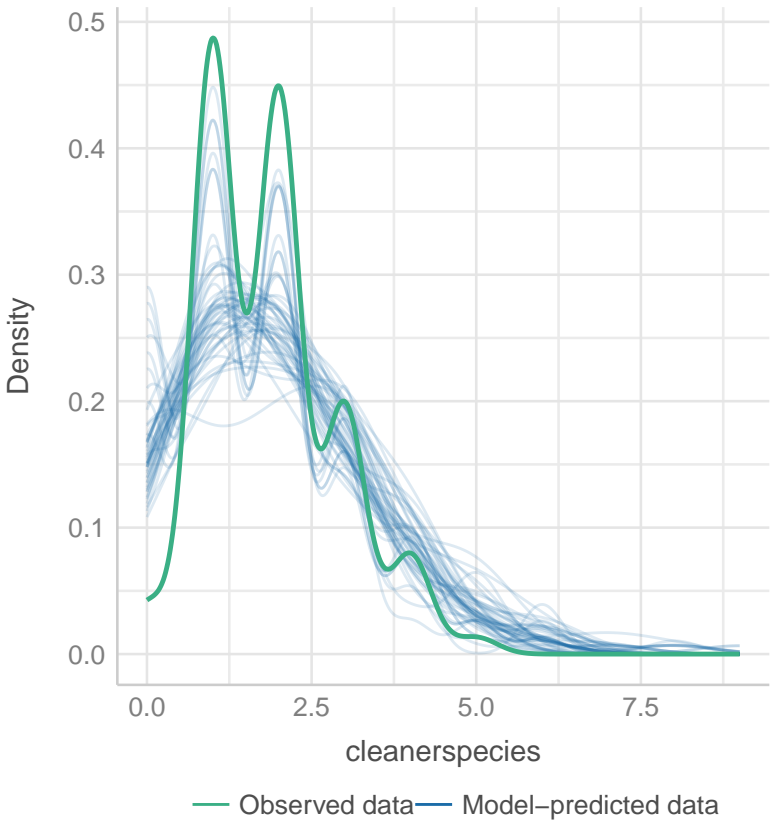

Overdispersion and zero-inflation  
Observed residual variance (green) should follow predicted residual

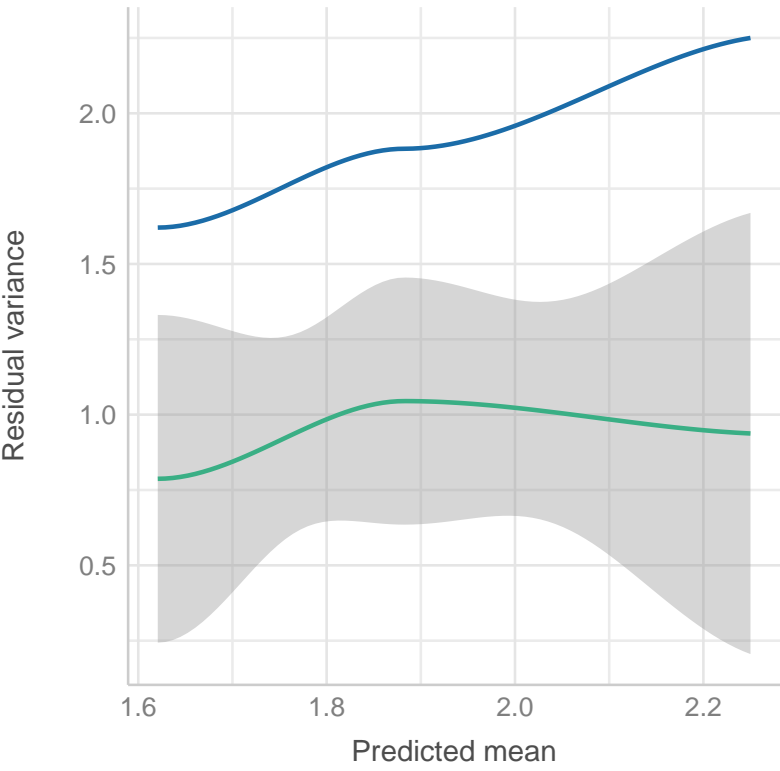

Homogeneity of Variance  
Reference line should be flat and horizontal

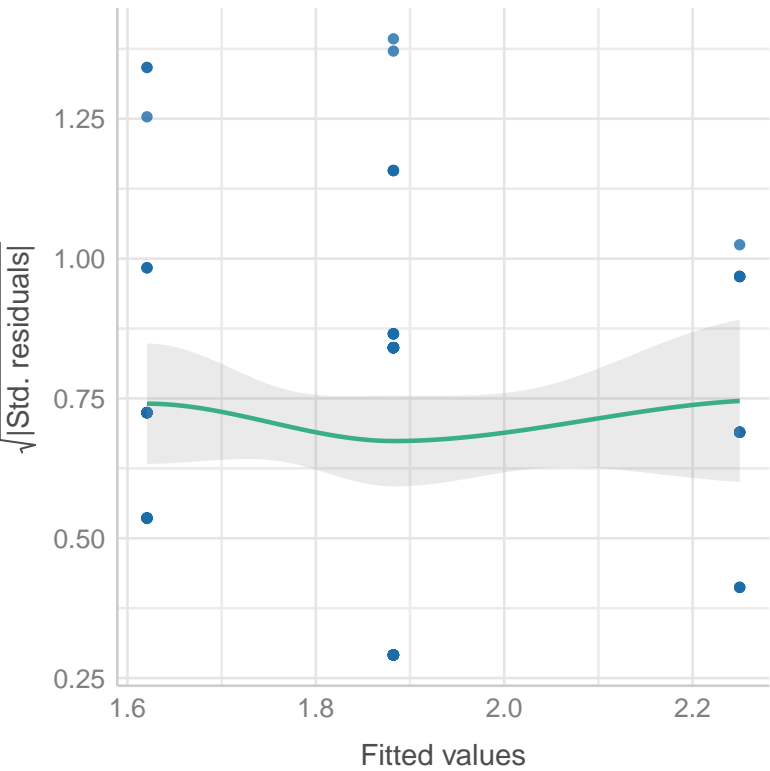

Influential Observations  
Points should be inside the contour lines

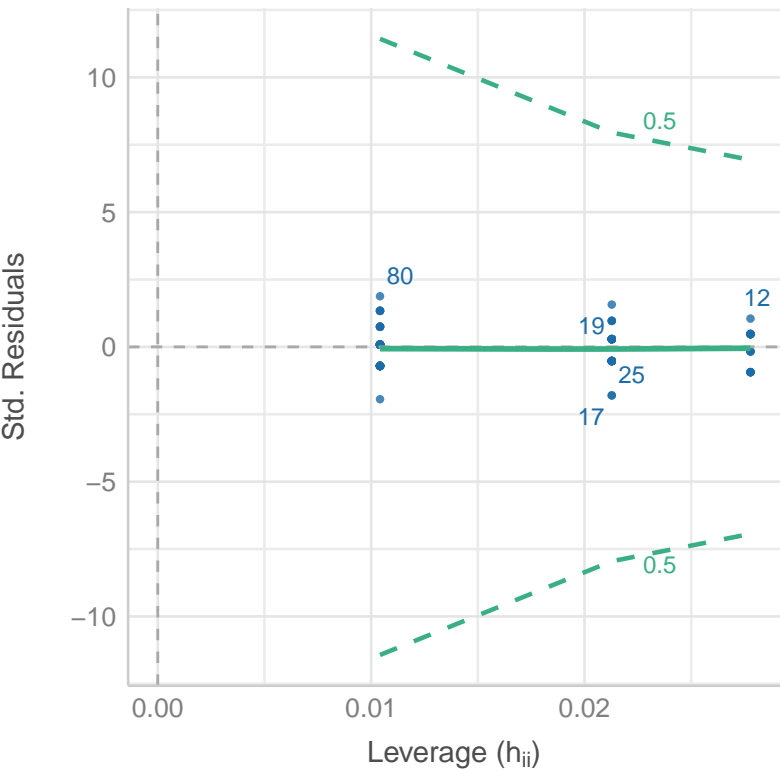

Normality of Residuals  
Dots should fall along the line

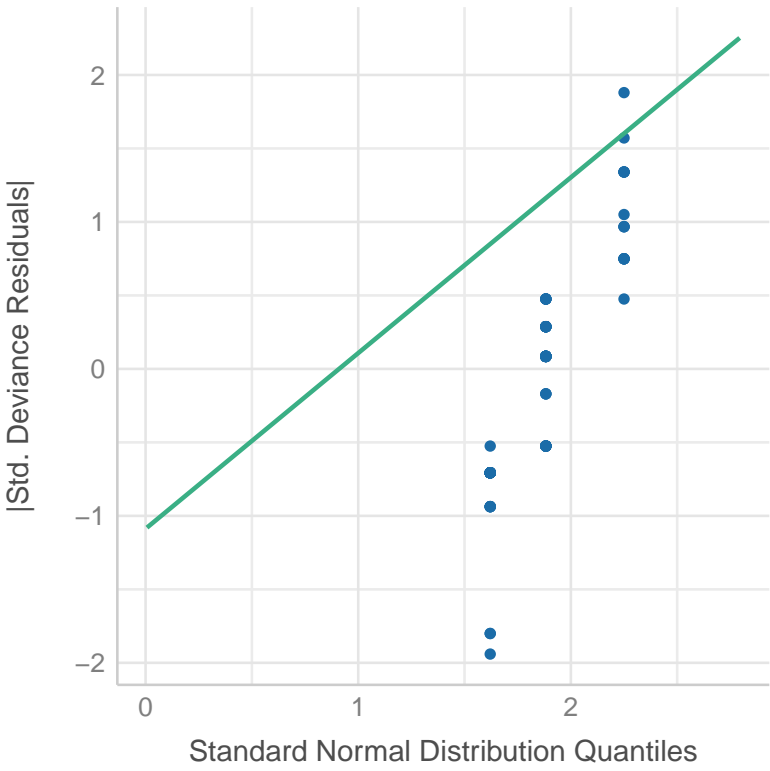

Normality of Random Effects (site)  
Dots should be plotted along the line

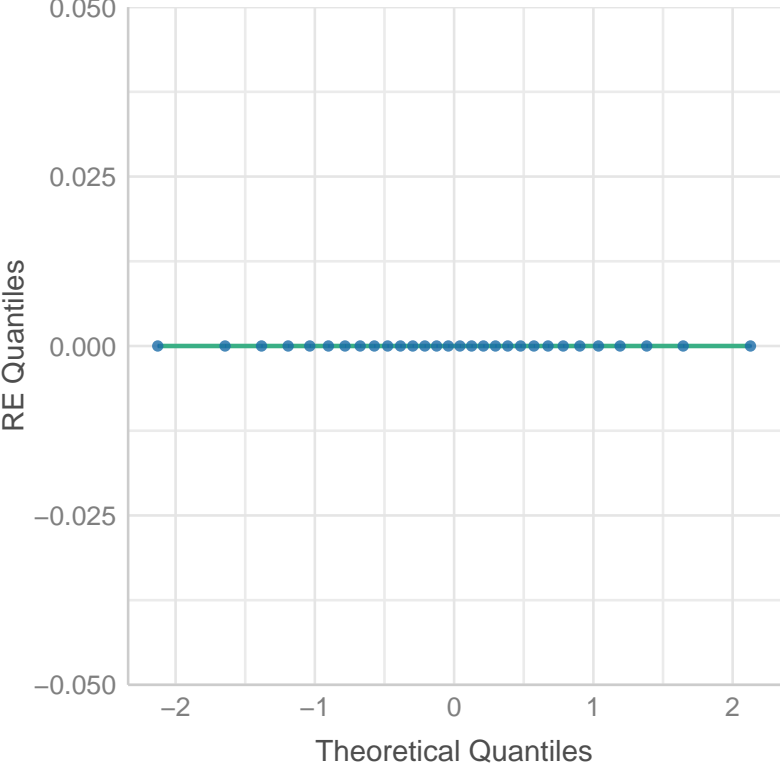

Supplement: Supplementary_Material_statistical_analyzes.zip [file Supplementary_Material_statistical_analyzes.zip]
