# Supplementary material for: Cleaning symbiosis in coral reefs of Jardines de la Reina National Park
Source: PeerJ journal article supplement (doi:10.7717/peerj.16524), 2023-12-06

Posterior Predictive Check

Model-predicted lines should resemble observed data line

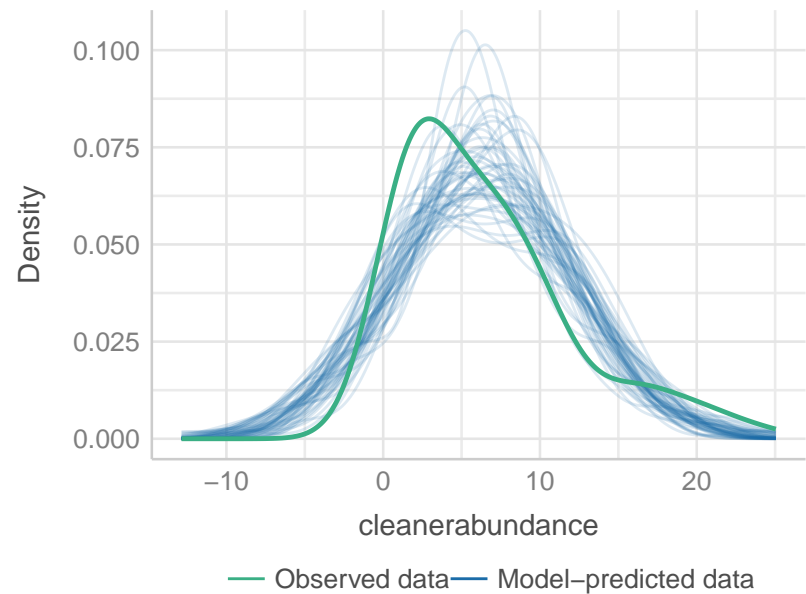

Linearity

Reference line should be flat and horizontal

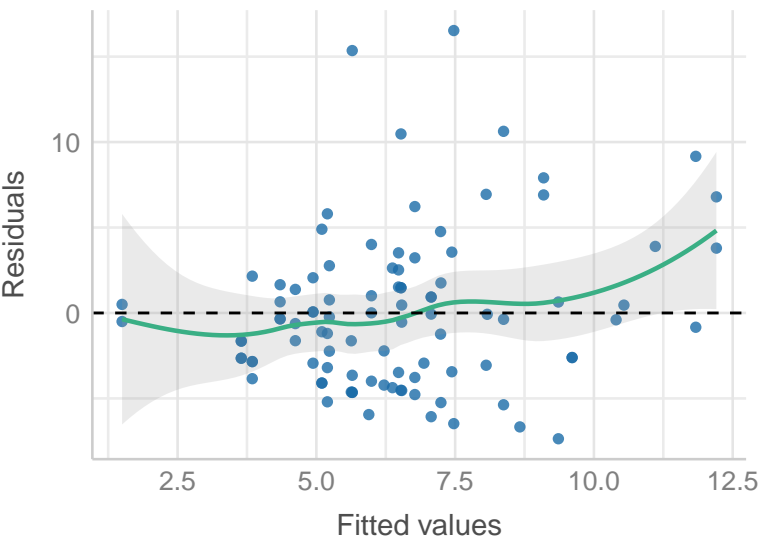

Homogeneity of Variance

Reference line should be flat and horizontal

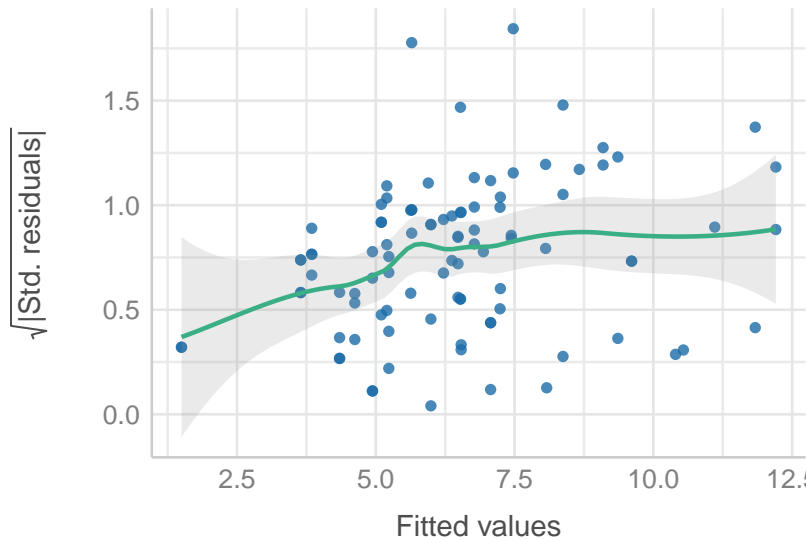

Influential Observations

Points should be inside the contour lines

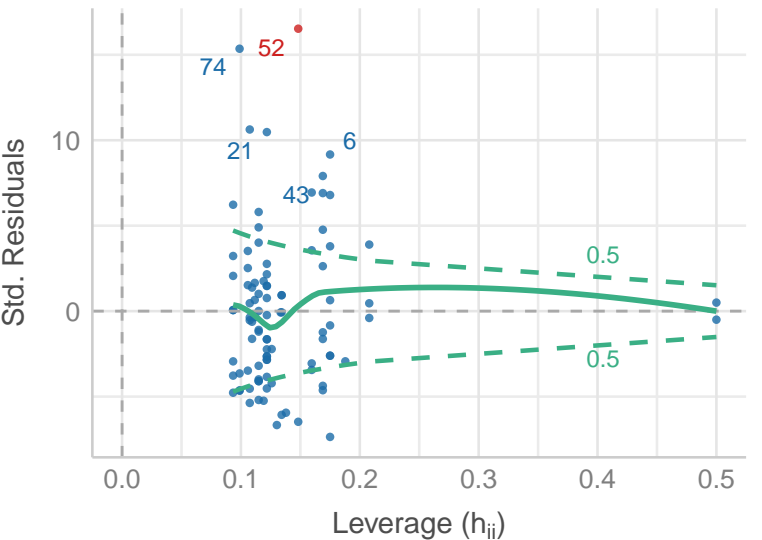

Collinearity

High collinearity (VIF) may inflate parameter uncertainty

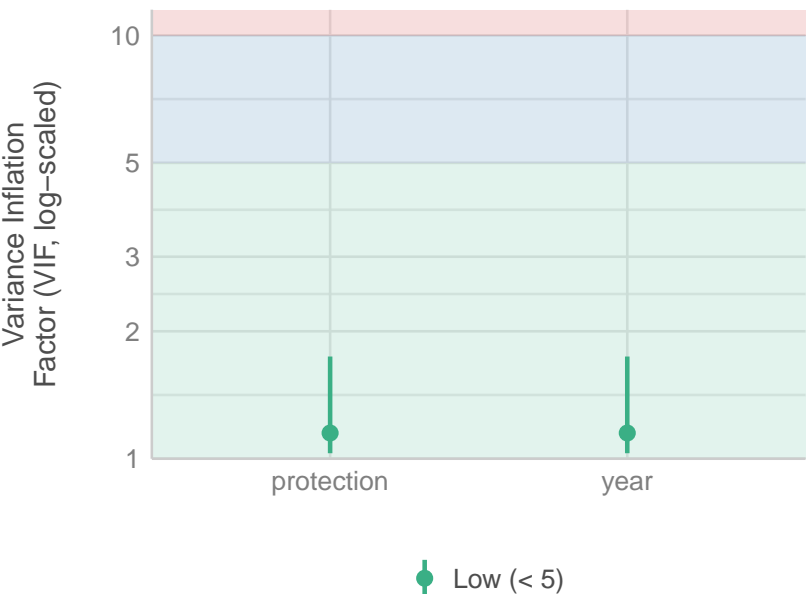

Normality of Residuals

Dots should fall along the line

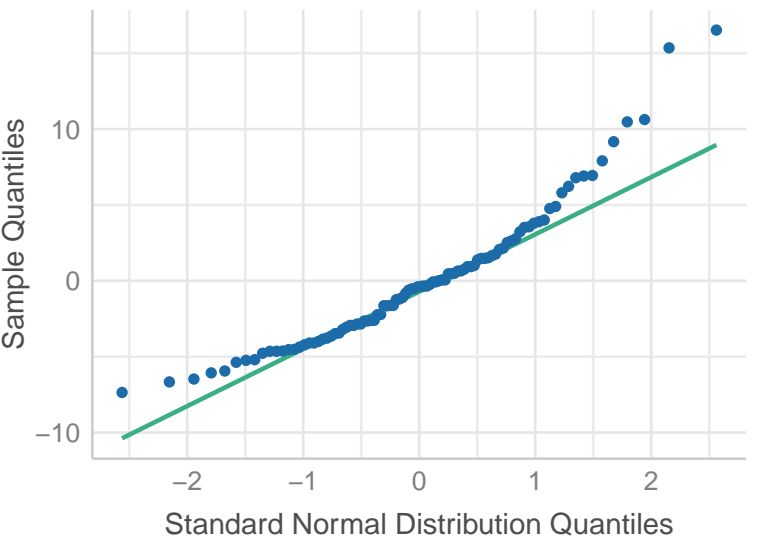

Normality of Random Effects (site)

Dots should be plotted along the line

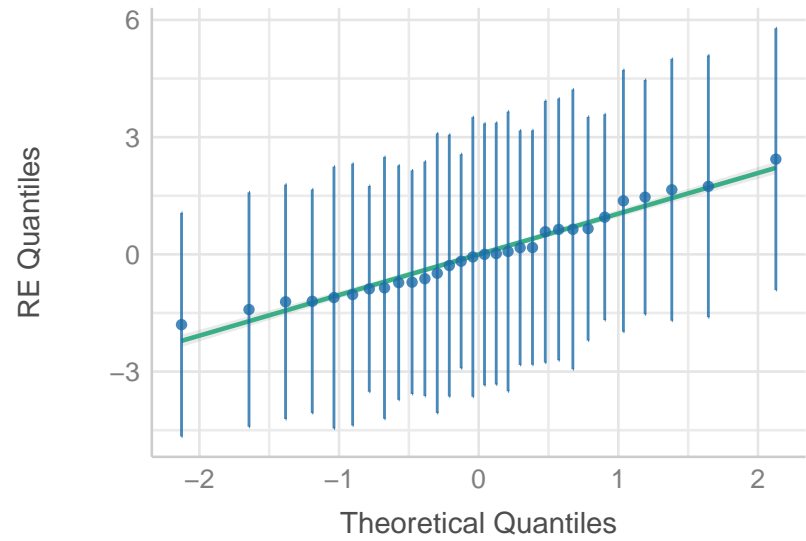

Supplement: Supplementary_Material_statistical_analyzes.zip [file Supplementary_Material_statistical_analyzes.zip]
