# Supplementary material for: Cleaning symbiosis in coral reefs of Jardines de la Reina National Park
Source: PeerJ journal article supplement (doi:10.7717/peerj.16524), 2023-12-06
Supplement: Supplementary_Material_statistical_analyzes.zip [file Supplementary_Material_statistical_analyzes.zip]

## Sheet: GLMM
	Model	Name	Formula	Family	Method	AIC	LogLik	isSingular	R2 (cond.)	R (marg.)	Values included in IC	Residual Analisis
	GLMM	MOD1	cleaningstation ~ protection + year + (1 | site)	poisson ( log )	maximum likelihood (Adaptive Gauss-Hermite Quadrature)	76.1	-32.1	Yes	0.02	0.02	1	See MOD_1.pdf
	GLMM	MOD2	clientspecies ~ protection + year + (1 | site)	poisson ( log )	maximum likelihood (Adaptive Gauss-Hermite Quadrature)	127.3	-57.6	Yes	0.12	0.12	1	See MOD_2.pdf
	GLMM	MOD3	cleanerspecies~ protection + year + (1 | site)	poisson ( log )	maximum likelihood (Adaptive Gauss-Hermite Quadrature)	56.6	-22.3	Yes	0.1	0.1	1	See MOD_3.pdf
	GLMM	MOD4	clientabundance ~ protection + year + (1 | site)	gaussian (identity)	REML	630.59	na	Yes	0.06	0.06	1	See MOD_4.pdf
	GLMM	MOD5	cleanerabudance ~ protection + year + (1 | site)	gaussian (identity)	REML	584008	na	No	0.23	0.11	0.9	See MOD_5.pdf
	GLMM	MOD6	cleaningstation ~ protection + (1 | site)	poisson ( log )	maximum likelihood (Adaptive Gauss-Hermite Quadrature)	72.9	-32.4	Yes	0.07	0.07	1	See MOD_6.pdf
	GLMM	MOD7	clientspecies ~ protection + (1 | site)	poisson ( log )	maximum likelihood (Adaptive Gauss-Hermite Quadrature)	129.7	-60.8	No	0.07	0.05	0.7	See MOD_7.pdf
	GLMM	MOD8	cleanerspecies~ protection + (1 | site)	poisson ( log )	maximum likelihood (Adaptive Gauss-Hermite Quadrature)	58.6	-25.3	Yes	0.02	0.02	1	See MOD_8.pdf
	GLMM	MOD9	clientabundance ~ protection + (1 | site)	gaussian (identity)	REML	640		No	0.02	0.005	0.6	See MOD_9.pdf
	GLMM	MOD10	cleanerabudance ~ protection + (1 | site)	gaussian (identity)	REML	310	-151.4	No	0.66	0.12	1	See MOD_10.pdf
